# Supplementary material for: Examining the Impacts of Measurement Error in Quantifying Health Disparities: A Case Study on Type-2 Diabetes and the Food Environment
Source: Research Square preprint supplement (doi:10.21203/rs.3.rs-6348313/v1), 2025-04-03
Supplement: Supplementary file 1 [file 9b44721fe745fc84eebd5cdc.pdf]

# **Supporting Information for “Examining the Impacts of Measurement Error in Quantifying Health Disparities: A Case Study on Type-2 Diabetes and the Food Environment”**

Cassandra K. Hung, Darcy Green, and Sarah C. Lotspeich  
Department of Statistical Sciences, Wake Forest University

April 1, 2025

Table S1: Results based on the analyses of proximity-based disparities in diabetes based on straight-line and map-based distances (binned into roughly 1-mile categories).

| Exposure (Binned)              | $j$ | Patients<br>$n(\%)$ | Diabetes Prevalence<br>(95% CI) | Rate Ratio<br>(95% CI) | Relative Index of<br>Inequality (95% CI) |
|--------------------------------|-----|---------------------|---------------------------------|------------------------|------------------------------------------|
| <i>Straight-Line Proximity</i> |     |                     |                                 |                        |                                          |
| More than 5 miles              | 1   | 53 (6%)             | 0.09 (0.02, 0.17)               | 1.44 (0.58, 3.59)      | 1.12 (0.45, 2.75)                        |
| Between 4 – 5 miles            | 2   | 41 (4%)             | 0.00 (0.00, 0.00)               | 0.00 (0.00, 0.00)      | -                                        |
| Between 3 – 4 miles            | 3   | 72 (8%)             | 0.10 (0.03, 0.17)               | 1.49 (0.67, 3.29)      | -                                        |
| Between 2 – 3 miles            | 4   | 107 (12%)           | 0.07 (0.02, 0.11)               | 1.00 (0.45, 2.24)      | -                                        |
| Between 1 – 2 miles            | 5   | 238 (26%)           | 0.07 (0.04, 0.10)               | 1.09 (0.61, 1.96)      | -                                        |
| Up to 1 mile                   | 6   | 413 (45%)           | 0.07 (0.04, 0.09)               | Referent               | Referent                                 |
| <i>Map-Based Proximity</i>     |     |                     |                                 |                        |                                          |
| More than 5 miles              | 1   | 119 (13%)           | 0.06 (0.02, 0.10)               | 0.98 (0.41, 2.34)      | 1.10 (0.45, 2.64)                        |
| Between 4 – 5 miles            | 2   | 71 (8%)             | 0.11 (0.04, 0.19)               | 1.88 (0.83, 4.25)      | -                                        |
| Between 3 – 4 miles            | 3   | 92 (10%)            | 0.07 (0.01, 0.12)               | 1.09 (0.43, 2.72)      | -                                        |
| Between 2 – 3 miles            | 4   | 126 (14%)           | 0.04 (0.01, 0.07)               | 0.66 (0.25, 1.78)      | -                                        |
| Between 1 – 2 miles            | 5   | 266 (29%)           | 0.08 (0.05, 0.12)               | 1.38 (0.73, 2.60)      | -                                        |
| Up to 1 mile                   | 6   | 250 (27%)           | 0.06 (0.03, 0.09)               | Referent               | Referent                                 |

Table S2: Results based on the analyses of food insecurity-based disparities in diabetes based on the lower bound, survey estimate, and upper bound (binned into roughly 2.5% categories).

| Exposure (Binned)                         | <i>j</i> | Patients<br><i>n</i> (%) | Diabetes Prevalence<br>(95% CI) | Rate Ratio<br>(95% CI) | Relative Index of<br>Inequality (95% CI) |
|-------------------------------------------|----------|--------------------------|---------------------------------|------------------------|------------------------------------------|
| <i>Lower Bound of Food Insecurity</i>     |          |                          |                                 |                        |                                          |
| More than 20%                             | 1        | 124 (13%)                | 0.11 (0.06, 0.17)               | 1.82 (0.87, 3.80)      | 2.26 (0.94, 5.57)                        |
| Between 17.5 – 20%                        | 2        | 239 (26%)                | 0.07 (0.04, 0.10)               | 1.08 (0.52, 2.22)      | -                                        |
| Between 15 – 17.5%                        | 3        | 36 (4%)                  | 0.06 (0.00, 0.13)               | 0.89 (0.21, 3.82)      | -                                        |
| Between 12.5 – 15%                        | 4        | 174 (19%)                | 0.09 (0.04, 0.13)               | 1.39 (0.67, 2.88)      | -                                        |
| Between 10 – 12.5%                        | 5        | 158 (17%)                | 0.03 (0.00, 0.05)               | 0.41 (0.13, 1.24)      | -                                        |
| Up to 10%                                 | 6        | 193 (21%)                | 0.06 (0.03, 0.10)               | Referent               | Referent                                 |
| <i>Survey Estimate of Food Insecurity</i> |          |                          |                                 |                        |                                          |
| More than 20%                             | 1        | 270 (23%)                | 0.08 (0.05, 0.11)               | 1.20 (0.61, 2.37)      | 1.65 (0.69, 4.05)                        |
| Between 17.5 – 20%                        | 2        | 109 (12%)                | 0.08 (0.03, 0.13)               | 1.22 (0.53, 2.79)      | -                                        |
| Between 15 – 17.5%                        | 3        | 118 (13%)                | 0.06 (0.02, 0.10)               | 0.88 (0.35, 2.16)      | -                                        |
| Between 12.5 – 15%                        | 4        | 169 (18%)                | 0.07 (0.03, 0.11)               | 0.96 (0.44, 2.12)      | -                                        |
| Between 10 – 12.5%                        | 5        | 81 (9%)                  | 0.02 (0.00, 0.06)               | 0.36 (0.08, 1.59)      | -                                        |
| Up to 10%                                 | 6        | 177 (19%)                | 0.07 (0.03, 0.10)               | Referent               | Referent                                 |
| <i>Upper Bound of Food Insecurity</i>     |          |                          |                                 |                        |                                          |
| More than 20%                             | 1        | 376 (41%)                | 0.08 (0.05, 0.11)               | 1.04 (0.49, 2.19)      | 1.81 (0.73, 4.61)                        |
| Between 17.5 – 20%                        | 2        | 96 (10%)                 | 0.08 (0.03, 0.14)               | 1.08 (0.42, 2.77)      | -                                        |
| Between 15 – 17.5%                        | 3        | 156 (17%)                | 0.07 (0.03, 0.11)               | 0.92 (0.38, 2.20)      | -                                        |
| Between 12.5 – 15%                        | 4        | 103 (11%)                | 0.02 (0.00, 0.05)               | 0.25 (0.05, 1.16)      | -                                        |
| Between 10 – 12.5%                        | 5        | 89 (10%)                 | 0.04 (0.00, 0.09)               | 0.58 (0.18, 1.88)      | -                                        |
| Up to 10%                                 | 6        | 104 (11%)                | 0.08 (0.03, 0.13)               | Referent               | Referent                                 |
